# Supplementary material for: Isoquinoline Alkaloids from Coptis chinensis Franch: Focus on Coptisine as a Potential Therapeutic Candidate against Gastric Cancer Cells
Source: MDPI journal article supplement (doi:10.3390/ijms231810330), 2022-09-07

## Supplementary file

# Isoquinoline alkaloids from *Coptis chinensis* Franch: focus on coptisine as a potential therapeutic candidate against gastric cancer cells

Sylvia Nakonieczna <sup>1A</sup>, Aneta Grabarska <sup>2A\*</sup>, Kinga Gawel <sup>3</sup>, Paula Wróblewska – Łuczka <sup>4</sup>,  
Arkadiusz Czerwonka <sup>2</sup>, Andrzej Stepulak <sup>2</sup> and Wirginia Kukula-Koch <sup>1,\*</sup>

**Figure S1.** The UV (at 290 nm) chromatogram of the methanolic extract from the rhizomes of *Coptischinensis*

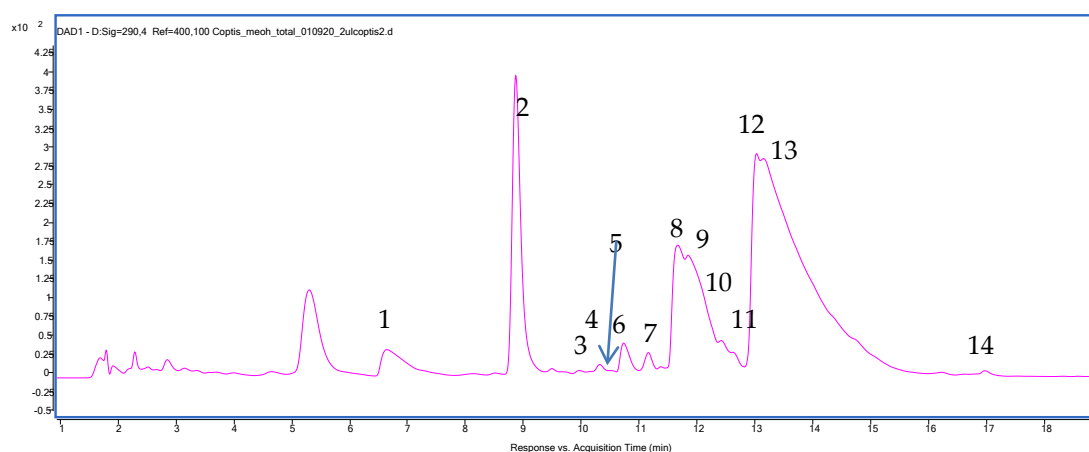

**Table S1.** The list of MS/MS spectra of the tentatively identified compounds

| Name of the compound | MS/MS spectrum |
|----------------------|----------------|
| Magnoflorine         |                |

## 4'-O-Methyl-N-methylcoclaurine

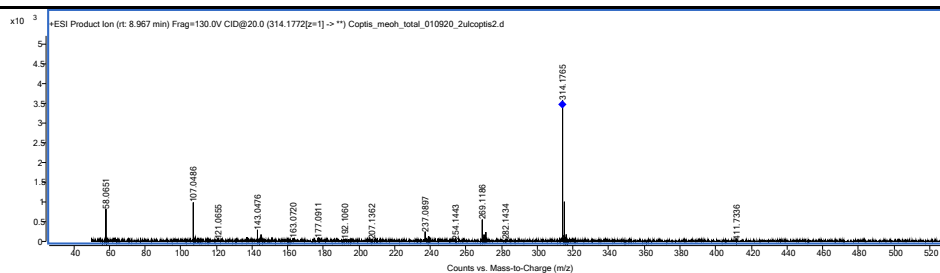

## Menisperine

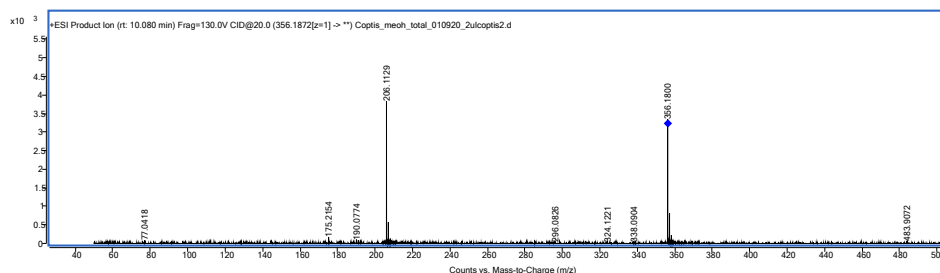

## Stecepharine

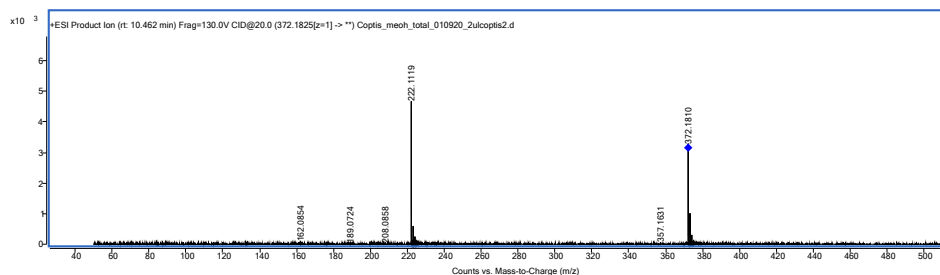

## Demethyleneberberine/iso

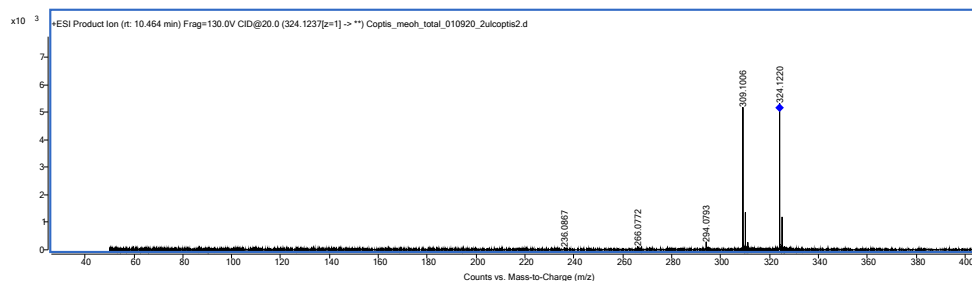

## Berberrubine/Thalifendine

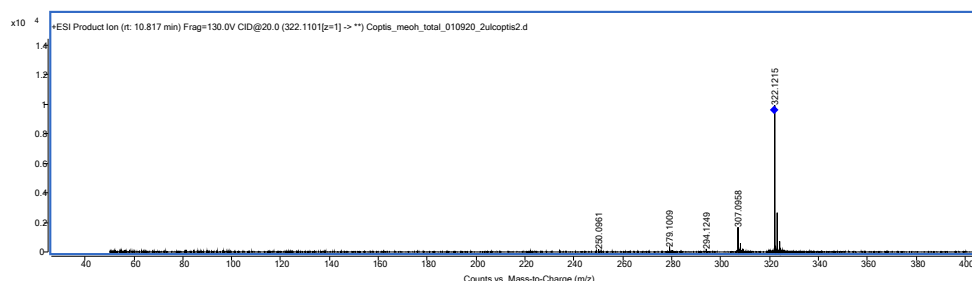

13-  
methyljatrorrhizine/13-methylcolumbamine

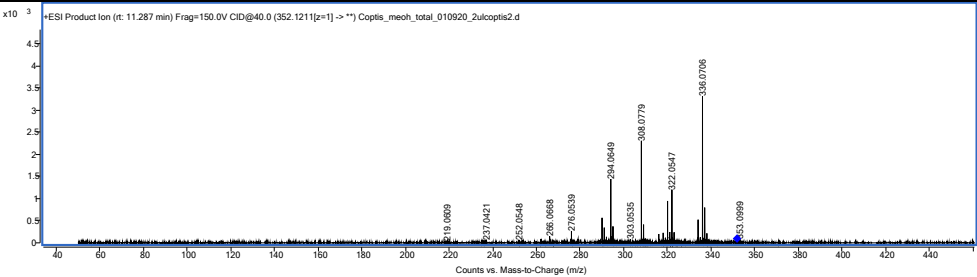

Columbamine

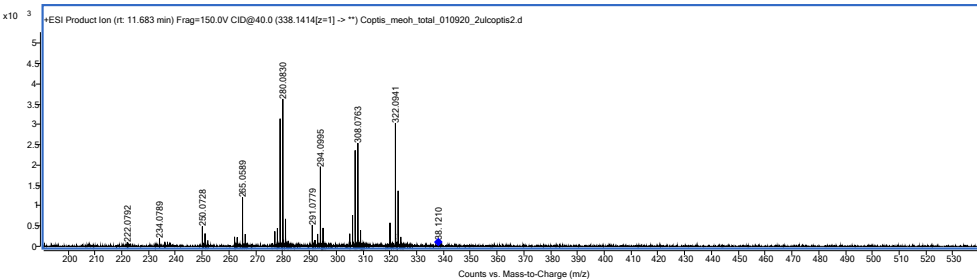

Epiberberine

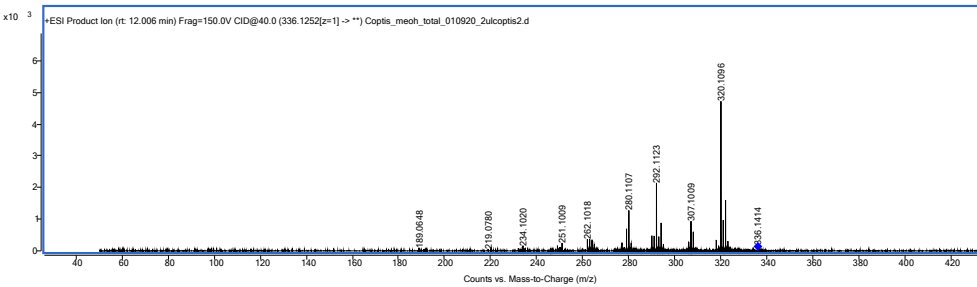

Jatrorrhizine

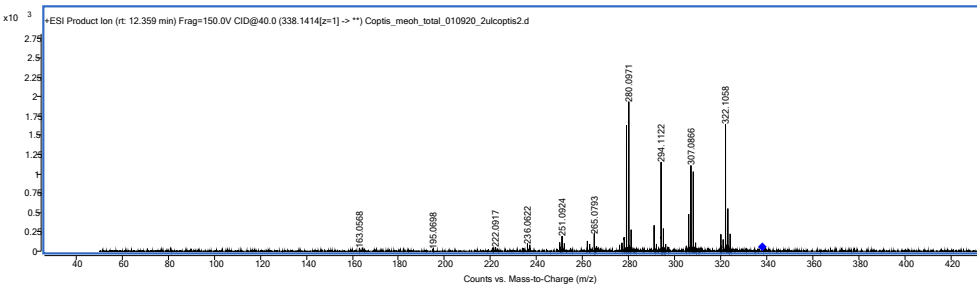

Coptisine

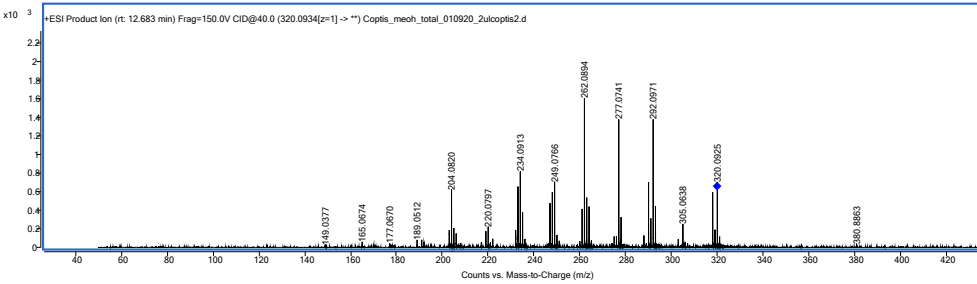

Palmatine

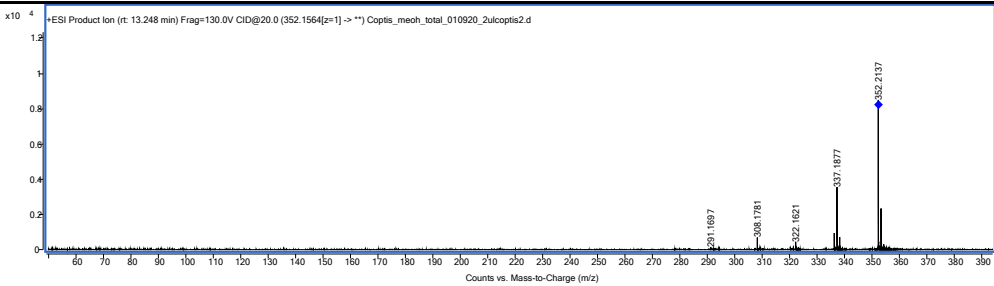

Berberine

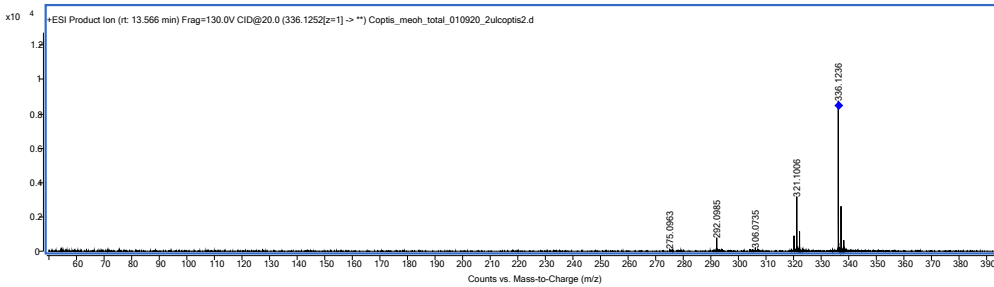

13-Methylberberine

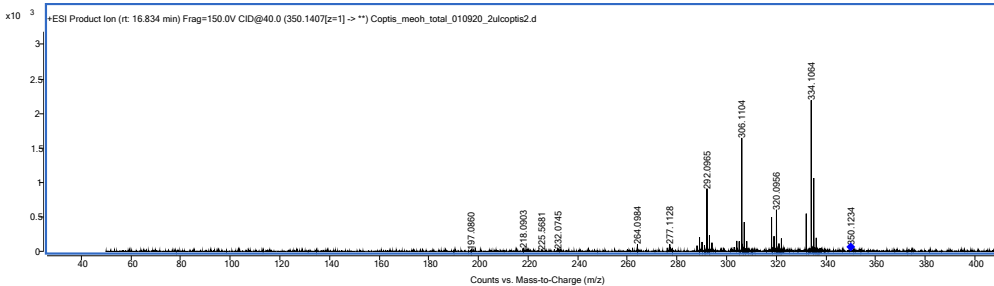

Dihydrosanguinarine

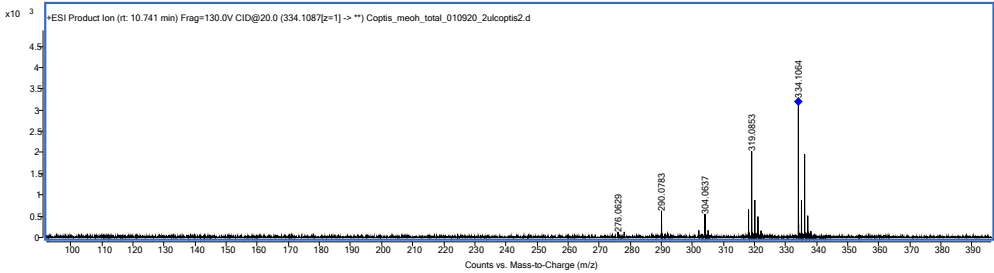

Phellodendrin

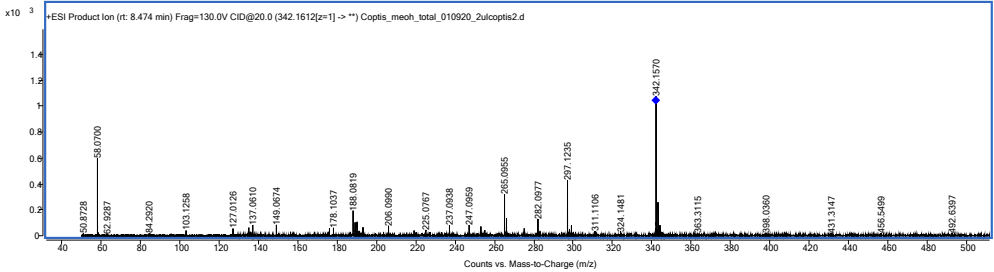

## Tetrahydroberberine

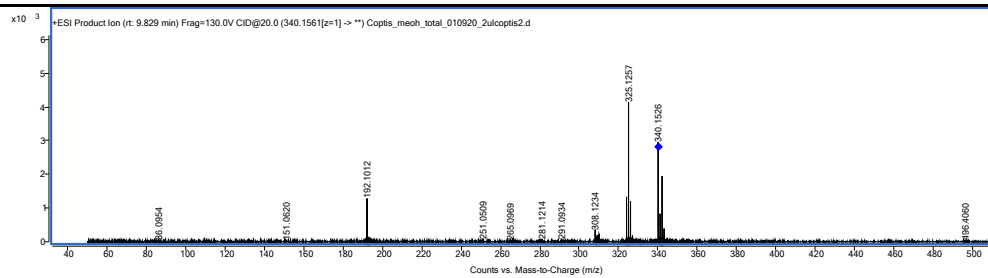

## Worenine

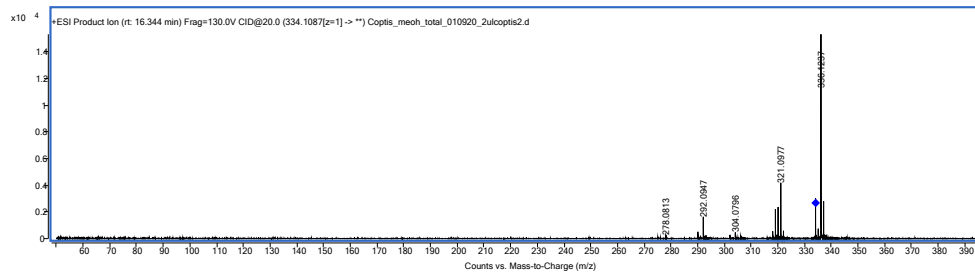

Supplement: s1 [file s1]
